# Supplementary material
Source: PubMed Central journal article supplement (PMC3058504)
Supplement: NIHMS229583-supplement-2.pdf [file NIHMS229583-supplement-2.pdf]

# COLOR ARTWORK PRODUCTION FORM

This form must be completed for all papers containing color artwork and supplementary information files. **Please return to:** *Cancer Gene Therapy*, Sidney Kimmel Cancer Center, 10835 Altman Row, San Diego, CA 92121, USA  
 Email: [MSL.Grimm@aol.com](mailto:MSL.Grimm@aol.com)

**IMPORTANT!** This form must be completed for all papers containing color artwork. We are unable to proof and publish your paper until we receive these instructions

**1. Details** Journal: **CANCER GENE THERAPY**

Manuscript Number:

Article title:

**2. Figures**

**Table 1.** Charges table for color reproduction in print.

| Number of color illustrations | 1     | 2       | 3       | 4       | 5       | 6       | 7+                                |
|-------------------------------|-------|---------|---------|---------|---------|---------|-----------------------------------|
| Cost                          | \$987 | \$1,470 | \$1,953 | \$2,247 | \$2,541 | \$2,793 | \$252 per additional color figure |

**Table 2.** Please account for all figures in your manuscript

| Figure Number corresponding to your manuscript | Black and White reproduction in print and online - FREE Place 'X' | Color online only reproduction (online full text version only) - FREE Place 'X' | Color reproduction in print and online - CHARGES (see table 1) Place 'X' |
|------------------------------------------------|-------------------------------------------------------------------|---------------------------------------------------------------------------------|--------------------------------------------------------------------------|
| 1                                              | X                                                                 |                                                                                 |                                                                          |
| 2                                              | X                                                                 |                                                                                 |                                                                          |
| 3                                              | X                                                                 |                                                                                 |                                                                          |
| 4                                              | X                                                                 |                                                                                 |                                                                          |
| 5                                              |                                                                   |                                                                                 |                                                                          |
| 6                                              |                                                                   |                                                                                 |                                                                          |
| 7                                              |                                                                   |                                                                                 |                                                                          |
| 8                                              |                                                                   |                                                                                 |                                                                          |
| 9                                              |                                                                   |                                                                                 |                                                                          |
| 10                                             |                                                                   |                                                                                 |                                                                          |
| Total figures of each type                     |                                                                   |                                                                                 |                                                                          |
| Cost                                           |                                                                   |                                                                                 |                                                                          |
| Total                                          |                                                                   |                                                                                 |                                                                          |

**3. Payment**

I agree to pay the costs in full and authorize Nature Publishing Group (NPG) to invoice me for the above amount.

Purchase order number: \_\_\_\_\_

I agree to pay the costs in full and authorize NPG to take payment from the credit card specified below:

Card type:  Visa  Mastercard  American Express

Card number: \_\_\_\_\_

Expiration date: \_\_\_\_\_

Card holder's name: \_\_\_\_\_

Card holder's signature: \_\_\_\_\_

Signature: Joseph Cullen Date: 6/29/10

Print name: Joseph Cullen E-mail: joseph-cullen@uiowa.edu
